# Supplementary material
Source: HighWire-hosted journal article supplement (https://erj.ersjournals.com/highwire/filestream/113870/field_highwire_adjunct_files/0/ERJ-01256-2012_Disclosures.pdf)
Supplement: ERJ-01256-2012_Disclosures.pdf [file ERJ-01256-2012_Disclosures.pdf]

**P.W. Jones** has received fees from pharmaceutical companies, including GlaxoSmithKline, for speaking at meetings and participating in advisory board meetings, and received support for research from pharmaceutical companies, including GlaxoSmithKline.

**L. Adamek** is an employee of GlaxoSmithKline.

**G. Nadeau** is Medical Affairs Director with a pharmaceutical company with COPD products.

**N. Banik** has been employed by GSK in the past 5 years.
